# Supplementary material for: Tetraspanins distinguish separate extracellular vesicle subpopulations in human serum and plasma – Contributions of platelet extracellular vesicles in plasma samples
Source: PubMed Central journal article supplement (PMC9077141; doi:10.1002/jev2.12213), 2022-05-06

# Supplementary Figure 1

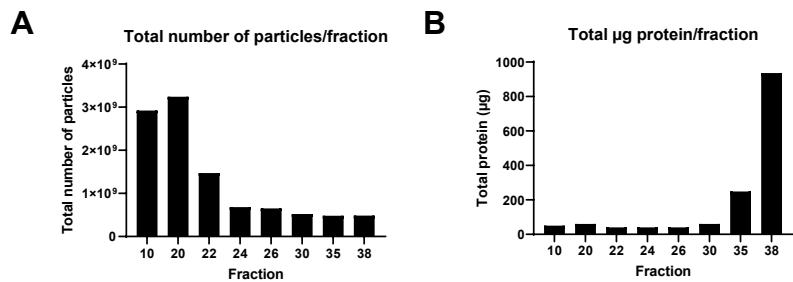

**C**

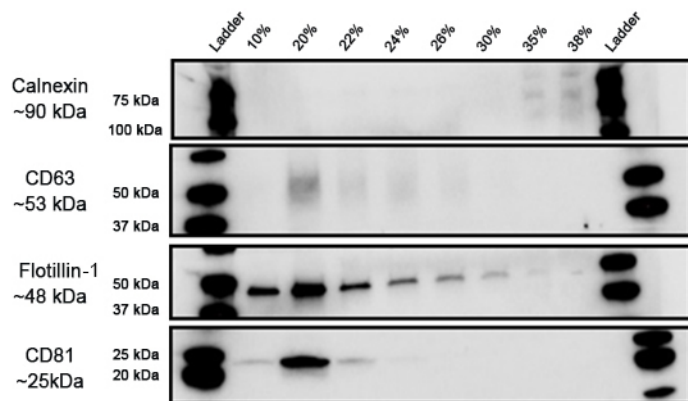

Supplement: JEV2-11-e12213-s003.pdf [file JEV2-11-e12213-s003.pdf]
